# Supplementary material for: Effects of Electrical Automatic Massage on Cognition and Sleep Quality in Alzheimer's Disease Spectrum Patients: A Randomized Controlled Trial
Source: PubMed Central journal article supplement — Yonsei Med J. 2021 Jul 19;62(8):717–25. doi: 10.3349/ymj.2021.62.8.717 (PMC8298867; doi:10.3349/ymj.2021.62.8.717), 2021-07-19
Supplement: ymj-62-717-s001.pdf [file ymj-62-717-s001.pdf]

**Supplementary Table 1.** Results of Paired T-Test and Repeated Measures Analysis of Variance for Neuropsychological Tests

| Neuropsychological tests | EAM group       |                 |                | Control group  |                 |                |
|--------------------------|-----------------|-----------------|----------------|----------------|-----------------|----------------|
|                          | Baseline        | 12 months       | <i>p</i> value | Baseline       | 12 months       | <i>p</i> value |
| Digit span forward       | 5.16 (1.21)     | 4.96 (1.51)     | 0.346          | 5.55 (1.24)    | 5.59 (1.32)     | 0.846          |
| Digit span backward      | 2.96 (0.89)     | 3.20 (1.15)     | 0.219          | 3.59 (1.30)    | 3.24 (1.43)     | 0.087          |
| K-BNT                    | 40.56 (9.16)    | 36.56 (10.40)   | <0.001         | 38.57 (10.79)  | 35.32 (12.34)   | 0.002          |
| RCFT copy                | 24.50 (10.87)   | 21.98 (12.31)   | 0.049          | 27.74 (7.62)   | 23.88 (10.31)   | 0.001          |
| SVLT immediate recall    | 13.69 (3.74)    | 12.69 (4.59)    | 0.081          | 12.93 (4.74)   | 12.07 (5.01)    | 0.088          |
| SVLT delayed recall      | 1.24 (1.85)     | 0.80 (1.35)     | 0.147          | 1.48 (1.88)    | 0.93 (1.81)     | 0.031          |
| SVLT recognition         | 17.60 (3.14)    | 16.48 (2.58)    | 0.032          | 16.97 (2.64)   | 16.21 (2.98)    | 0.082          |
| RCFT immediate recall    | 4.14 (3.54)     | 3.14 (4.13)     | 0.010          | 4.16 (3.52)    | 3.05 (3.24)     | 0.017          |
| RCFT delayed recall      | 3.82 (4.21)     | 2.40 (4.29)     | 0.014          | 3.52 (3.46)    | 2.62 (3.20)     | 0.014          |
| RCFT recognition         | 16.92 (2.61)    | 16.72 (3.13)    | 0.678          | 16.69 (2.79)   | 16.45 (2.76)    | 0.541          |
| COWAT animal             | 11.00 (3.16)    | 10.28 (4.29)    | 0.300          | 11.76 (4.23)   | 10.10 (4.63)    | 0.001          |
| COWAT supermarket        | 11.24 (5.04)    | 10.16 (3.66)    | 0.302          | 11.10 (5.20)   | 8.69 (5.03)     | 0.018          |
| COWAT phonemic           | 16.83 (9.19)    | 16.50 (10.78)   | 0.852          | 19.86 (10.06)  | 16.28 (9.80)    | 0.007          |
| Stroop color reading     | 51.56 (28.89)   | 48.56 (36.44)   | 0.427          | 58.48 (30.95)  | 48.28 (33.87)   | 0.001          |
| DSC                      | 35.74 (15.82)   | 30.16 (17.15)   | 0.014          | 41.30 (17.78)  | 36.22 (18.25)   | 0.002          |
| K-TMT-E-B time           | 133.63 (105.88) | 150.63 (119.49) | 0.320          | 118.05 (96.90) | 135.90 (105.70) | 0.332          |
| CDR sum of boxes         | 2.88 (1.68)     | 3.81 (2.17)     | <0.001         | 2.41 (1.28)    | 3.62 (2.55)     | 0.001          |

  

|      | EAM group    |              |              |                | Control group |              |              |                |
|------|--------------|--------------|--------------|----------------|---------------|--------------|--------------|----------------|
|      | Baseline     | 6 months     | 12 months    | <i>p</i> value | Baseline      | 6 months     | 12 months    | <i>p</i> value |
| MMSE | 22.70 (3.75) | 21.30 (5.05) | 20.35 (4.93) | 0.031          | 24.09 (3.59)  | 23.09 (4.18) | 22.09 (4.83) | 0.076          |

CDR, Clinical Dementia Rating; COWAT, Controlled Oral Word Association Test; DSC, Digit Symbol Coding; EAM, electrical automatic massage; K-BNT, Korean version of the Boston Naming Test; K-TMT-E-B, Korean Trail Making Test-Elderly's version part B; MMSE, Mini-Mental State Examination; RCFT, Rey-Osterrieth Complex Figure Test; SD, standard deviation; SVLT, Seoul Verbal Learning Test.

Data are presented as mean (SD).
