# Supplementary material for: Effects of Electrical Automatic Massage on Cognition and Sleep Quality in Alzheimer's Disease Spectrum Patients: A Randomized Controlled Trial
Source: PubMed Central journal article supplement — Yonsei Med J. 2021 Jul 19;62(8):717–25. doi: 10.3349/ymj.2021.62.8.717 (PMC8298867; doi:10.3349/ymj.2021.62.8.717), 2021-07-19
Supplement: ymj-62-717-s002.pdf [file ymj-62-717-s002.pdf]

**Supplementary Table 2.** Results of Repeated Measures Analysis of Variance for Questionnaires

| Questionnaires     | EAM group    |              |              |                | Control group |              |              |                |
|--------------------|--------------|--------------|--------------|----------------|---------------|--------------|--------------|----------------|
|                    | Baseline     | 6 months     | 12 months    | <i>p</i> value | Baseline      | 6 months     | 12 months    | <i>p</i> value |
| PSQI-K total score | 3.26 (2.83)  | 3.09 (3.04)  | 3.61 (2.61)  | 0.238          | 3.96 (3.20)   | 4.35 (3.24)  | 3.96 (2.21)  | 0.902          |
| Sleep quality      | 0.78 (0.80)  | 0.48 (0.73)  | 0.78 (0.74)  | 0.080          | 0.58 (0.72)   | 0.75 (0.79)  | 0.96 (0.46)  | 0.387          |
| Sleep latency      | 0.83 (0.89)  | 0.70 (0.97)  | 0.78 (0.90)  | 0.692          | 1.08 (1.14)   | 1.21 (1.18)  | 1.13 (1.08)  | 0.462          |
| Sleep duration     | 0.52 (0.73)  | 0.57 (0.90)  | 0.65 (0.93)  | 0.418          | 0.67 (1.09)   | 0.67 (0.92)  | 0.58 (0.88)  | 0.721          |
| Sleep disturbance  | 0.83 (0.58)  | 0.87 (0.46)  | 0.78 (0.42)  | 0.001          | 0.96 (0.62)   | 0.88 (0.68)  | 0.79 (0.59)  | 0.973          |
| K-GDS-30           | 8.04 (6.02)  | 6.17 (4.72)  | 6.83 (4.78)  | 0.509          | 9.48 (5.76)   | 8.80 (6.98)  | 8.64 (5.84)  | 0.699          |
| K-GAI              | 4.13 (4.39)  | 2.13 (2.56)  | 2.04 (2.03)  | 0.450          | 4.88 (4.50)   | 3.38 (3.74)  | 3.46 (3.86)  | 0.803          |
| Stress inventory   | 12.43 (4.92) | 11.65 (2.82) | 10.83 (2.71) | 0.984          | 12.21 (3.20)  | 12.21 (3.72) | 11.58 (2.67) | 0.867          |

EAM, electrical automatic massage; K-GAI, Korean version of the Geriatric Anxiety Inventory; MMSE, Mini-Mental State Examination; K-GDS, Korean version of the Geriatric Depression Scale; PSQI-K, Korean version of the Pittsburgh Sleep Quality Index; SD, standard deviation.

Data are presented as mean (SD).
