# Supplementary material for: Effects of Electrical Automatic Massage on Cognition and Sleep Quality in Alzheimer's Disease Spectrum Patients: A Randomized Controlled Trial
Source: PubMed Central journal article supplement — Yonsei Med J. 2021 Jul 19;62(8):717–25. doi: 10.3349/ymj.2021.62.8.717 (PMC8298867; doi:10.3349/ymj.2021.62.8.717), 2021-07-19
Supplement: ymj-62-717-s003.pdf [file ymj-62-717-s003.pdf]

**Supplementary Table 3.** Results of Paired T-Test for Cortical Thickness and Hippocampal Volume

| Cortical region         | EAM group        |                  |                | Control group    |                  |                |
|-------------------------|------------------|------------------|----------------|------------------|------------------|----------------|
|                         | Baseline         | 12 months        | <i>p</i> value | Baseline         | 12 months        | <i>p</i> value |
| Lt. cingulate thickness | 3.08 (0.17)      | 3.06 (0.20)      | 0.272          | 3.18 (0.18)      | 3.14 (0.19)      | 0.070          |
| Rt. cingulate thickness | 3.15 (0.13)      | 3.11 (0.18)      | 0.062          | 3.16 (0.15)      | 3.10 (0.15)      | 0.001          |
| Lt. frontal thickness   | 3.07 (0.12)      | 3.03 (0.12)      | 0.016          | 3.10 (0.11)      | 3.06 (0.13)      | 0.003          |
| Rt. frontal thickness   | 3.09 (0.11)      | 3.06 (0.10)      | 0.030          | 3.11 (0.09)      | 3.07 (0.12)      | 0.004          |
| Lt. parietal thickness  | 2.93 (0.15)      | 2.88 (0.19)      | 0.010          | 2.99 (0.13)      | 2.93 (0.16)      | 0.001          |
| Rt. parietal thickness  | 2.93 (0.14)      | 2.88 (0.16)      | 0.001          | 2.94 (0.14)      | 2.90 (0.16)      | 0.008          |
| Lt. temporal thickness  | 3.12 (0.16)      | 3.06 (0.17)      | 0.002          | 3.18 (0.15)      | 3.11 (0.17)      | <0.001         |
| Rt. temporal thickness  | 3.17 (0.16)      | 3.11 (0.16)      | 0.002          | 3.22 (0.15)      | 3.15 (0.17)      | <0.001         |
| Lt. occipital thickness | 2.87 (0.19)      | 2.81 (0.17)      | 0.015          | 2.88 (0.20)      | 2.80 (0.19)      | <0.001         |
| Rt. occipital thickness | 2.86 (0.16)      | 2.83 (0.16)      | 0.034          | 2.87 (0.17)      | 2.81 (0.15)      | 0.001          |
| Lt. hippocampal volume  | 2273.71 (437.78) | 2161.92 (496.55) | 0.181          | 2261.32 (573.76) | 2111.95 (499.15) | 0.019          |
| Rt. hippocampal volume  | 2295.45 (546.44) | 2195.10 (560.20) | 0.273          | 2369.03 (524.85) | 2213.92 (460.64) | 0.021          |

EAM, electrical automatic massage; Lt, left; Rt, right; SD, standard deviation.  
 Data are presented as mean (SD).
